# Supplementary material
Source: Royal Society of Chemistry journal article supplement (doi:10.1039/d6tc00647g)
Supplement: d6tc00647g1.pdf [file d6tc00647g1.pdf]

**Supporting Information for:**

**Enhanced thermoelectric performance of SnTe thin films by  
magnetron co-sputtering with optimized carrier concentration and  
microstructure**

Hong-yue Du<sup>1</sup>, Ye-chong Zhang<sup>1</sup>, Wei Li<sup>2</sup>, Yong Lu<sup>1,\*</sup>, and Jicai Zhang<sup>1,3,†</sup>

<sup>1</sup>College of Mathematics and Physics, Beijing University of Chemical Technology, Beijing 100029, China

<sup>2</sup>School of Electronic Information Engineering, Lanzhou Institute of Technology, Lanzhou 730050, China

<sup>3</sup>State Key Laboratory of Chemical Resource Engineering, Beijing University of Chemical Technology, Beijing 100029, China

\* Corresponding author: [luy@mail.buct.edu.cn](mailto:luy@mail.buct.edu.cn)

† Corresponding author: [jczhang@mail.buct.edu.cn](mailto:jczhang@mail.buct.edu.cn)

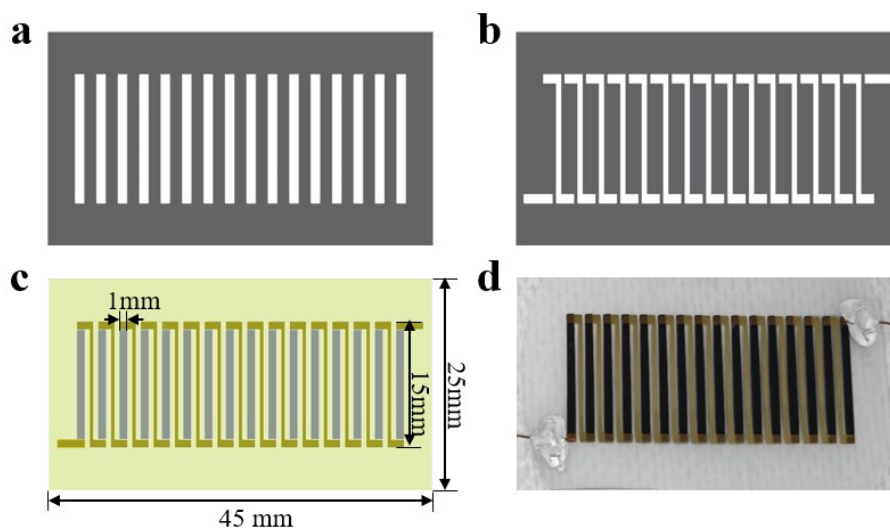

**Figure. S1** Stainless steel mask used for (a) sputtering of SnTe films and (b) sputtering of gold electrodes; (c) Specification drawing and (d) physical drawing of thin-film thermoelectric generator.

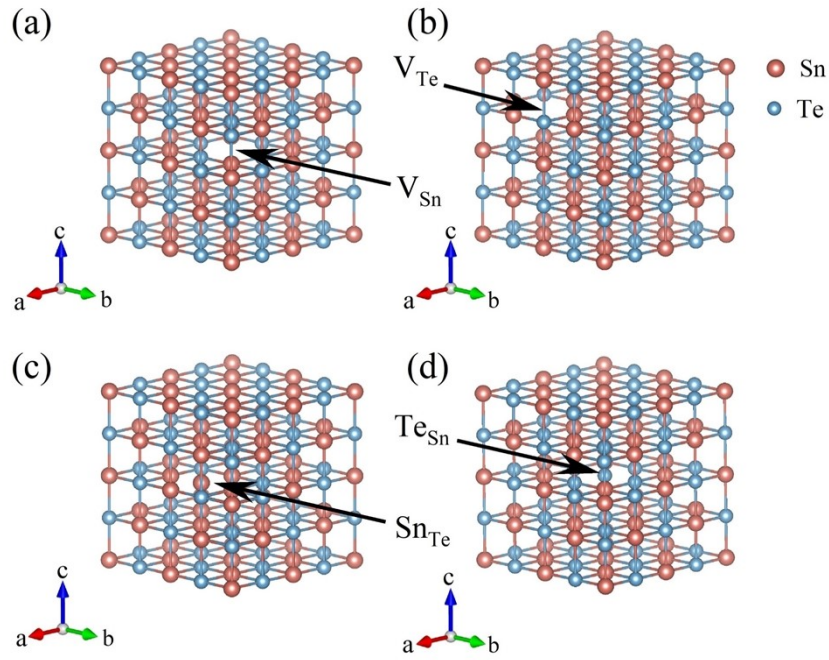

**Figure S2.** Computational supercell structures for vacancy and antisite defects in SnTe. (a) Sn vacancy ( $V_{\text{Sn}}$ ). (b) Te vacancy ( $V_{\text{Te}}$ ). (c) Sn antisite on Te sublattice ( $\text{Sn}_{\text{Te}}$ ). (d) Te antisite on Sn sublattice ( $\text{Te}_{\text{Sn}}$ ). Sn and Te atoms are represented by red and blue spheres respectively. The vacant sites are indicated by arrows.

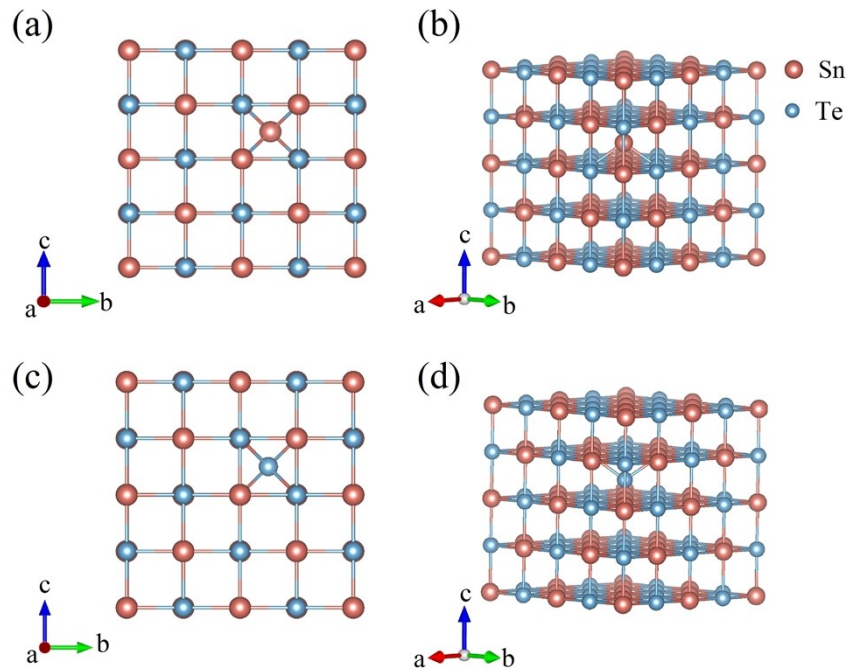

**Figure S3.** Computational supercell structures for interstitial defects in SnTe. (a), (b) Sn interstitial ( $\text{Sn}_i$ ). (c), (d) Te interstitial ( $\text{Te}_i$ ). Sn and Te atoms are represented by red and blue spheres respectively.

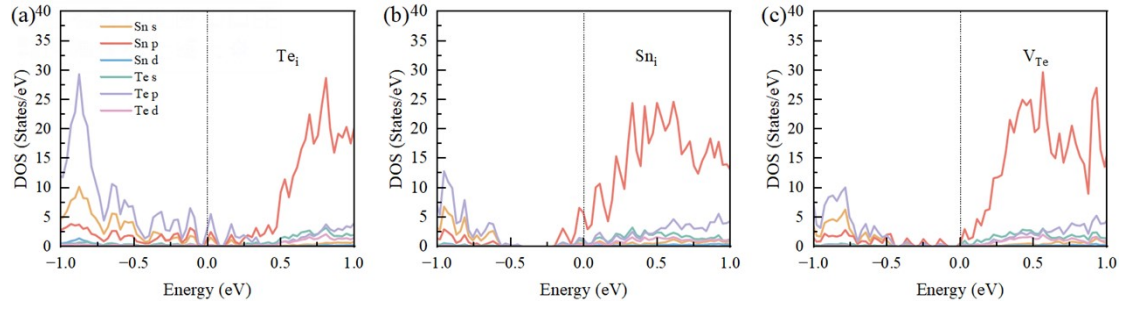

**Figure S4.** The calculated electronic density of states (DOS) for (a) Te interstitial  $\text{Te}_i$ , (b) Sn interstitial  $\text{Sn}_i$ , (c) Te vacancy  $\text{V}_{\text{Te}}$ .

**Table S1.** Experimental parameters of SnTe single-target sputtering (SnTe-ST) and SnTe-Te co-sputtering (SnTe-CT):

(a) The sputtering power of the SnTe target is variable. (In order to exclude the influence of film thickness on performance, experiments with different sputtering powers were carried out with the same thickness (all about 450 nm)).

| SnTe(W) | Te(W) | T(°C)            | Pressure(Pa) | Time(s) | $P_{\text{max}}$ (nW) |
|---------|-------|------------------|--------------|---------|-----------------------|
| 20      | 0     | Room temperature | 2            | 3171    | 0.003                 |
| 40      | 0     | Room temperature | 2            | 2400    | 0.087                 |
| 60      | 0     | Room temperature | 2            | 1900    | 0.151                 |
| 80      | 0     | Room temperature | 2            | 740     | 0.194                 |
| 100     | 0     | Room temperature | 2            | 560     | 0.030                 |

(b) The sputtering power of the Te target is variable

| SnTe(W) | Te(W) | T(°C)            | Pressure(Pa) | Time(s) | $P_{\text{max}}$ (nW) |
|---------|-------|------------------|--------------|---------|-----------------------|
| 80      | 0     | Room temperature | 2            | 740     | 0.194                 |
| 80      | 30    | Room temperature | 2            | 740     | 1.38                  |
| 80      | 40    | Room temperature | 2            | 740     | 1.40                  |
| 80      | 50    | Room temperature | 2            | 740     | 1.74                  |
| 80      | 60    | Room temperature | 2            | 740     | 1.67                  |

(c) The substrate temperature is variable

| SnTe(W) | Te(W) | T(°C)            | Pressure(Pa) | Time(s) | $P_{\text{max}}$ (nW) |
|---------|-------|------------------|--------------|---------|-----------------------|
| 80      | 50    | Room temperature | 2            | 740     | 1.74                  |
| 80      | 50    | 150              | 2            | 740     | 2.16                  |
| 80      | 50    | 200              | 2            | 740     | 1.77                  |
| 80      | 50    | 250              | 2            | 740     | 2.54                  |
| 80      | 50    | 300              | 2            | 740     | 1.83                  |

(d) The operating pressure is a variable

| SnTe(W) | Te(W) | T(°C) | Pressure(Pa) | Time(s) | Pmax(nW) |
|---------|-------|-------|--------------|---------|----------|
| 80      | 50    | 250   | 1.5          | 740     | 0.98     |
| 80      | 50    | 250   | 2            | 740     | 2.54     |
| 80      | 50    | 250   | 2.5          | 740     | 1.692    |
| 80      | 50    | 250   | 3            | 740     | 1.637    |

(e) The best experimental parameters of the two films in this work (thickness is about 2um)

|         | SnTe(W) | Te(W) | T(°C) | Pressure(Pa) | Time(s) | Pmax(nW) |
|---------|---------|-------|-------|--------------|---------|----------|
| SnTe-ST | 80      | 0     | 250   | 2            | 5000    | 7.83     |
| SnTe-CT | 80      | 50    | 250   | 2            | 5000    | 9.86     |

**Table S2.** Atomic compositions and numbers of atoms in the supercells used for the defect formation energy calculations of various defect types in SnTe.

|           | Sn atoms | Te atoms | Total |
|-----------|----------|----------|-------|
| Perfect   | 32       | 32       | 64    |
| $V_{Sn}$  | 31       | 32       | 63    |
| $V_{Te}$  | 32       | 31       | 63    |
| $Sn_i$    | 33       | 32       | 65    |
| $Te_i$    | 32       | 33       | 65    |
| $Sn_{Te}$ | 33       | 31       | 64    |
| $Te_{Sn}$ | 31       | 33       | 64    |

**Table S3.** Detailed parameters and energy values used in the defect formation energy calculations, including the chemical potentials and total energies of the pristine and defective supercells under Sn-rich and Te-rich conditions:

(a) The parameters under Sn-rich growth conditions

|                    | Sn-rich  |          |         |         |           |           |
|--------------------|----------|----------|---------|---------|-----------|-----------|
|                    | $V_{Sn}$ | $V_{Te}$ | $Sn_i$  | $Te_i$  | $Sn_{Te}$ | $Te_{Sn}$ |
| $E_{perf}$<br>(eV) | -242.05  | -242.05  | -242.05 | -242.05 | -242.05   | -242.05   |
| $E_{def}$<br>(eV)  | -237.33  | -236.83  | -243.89 | -242.24 | -241.29   | -240.06   |
| $\mu_{Sn}$<br>(eV) | -3.78    | -3.78    | -3.78   | -3.78   | -3.78     | -3.78     |
| $\mu_{Te}$<br>(eV) | -3.77    | -3.77    | -3.77   | -3.77   | -3.77     | -3.77     |
| $E_f$<br>(eV)      | 0.93     | 1.43     | 1.94    | 3.58    | 0.76      | 1.97      |

(b) The parameters under Te-rich growth conditions

|                           | Te-rich         |                 |               |               |                         |                         |
|---------------------------|-----------------|-----------------|---------------|---------------|-------------------------|-------------------------|
|                           | $V_{\text{Sn}}$ | $V_{\text{Te}}$ | $\text{Sn}_i$ | $\text{Te}_i$ | $\text{Sn}_{\text{Te}}$ | $\text{Te}_{\text{Sn}}$ |
| $E_{\text{perf}}$<br>(eV) | -242.05         | -242.05         | -242.05       | -242.05       | -242.05                 | -242.05                 |
| $E_{\text{def}}$<br>(eV)  | -237.33         | -236.83         | -243.89       | -242.24       | -241.29                 | -240.06                 |
| $\mu_{\text{Sn}}$<br>(eV) | -4.42           | -4.42           | -4.42         | -4.421        | -4.42                   | -4.42                   |
| $\mu_{\text{Te}}$<br>(eV) | -3.14           | -3.14           | -3.14         | -3.14         | -3.14                   | -3.14                   |
| $E_f$<br>(eV)             | 0.29            | 0.79            | 2.58          | 2.94          | 2.03                    | 0.70                    |

**Table S4.** Energy values of the Fermi level, valence band maximum (VBM), and conduction band minimum (CBM) for various defect configurations.

|                         | Fermi level (eV) | VBM (eV) | CBM (eV) |
|-------------------------|------------------|----------|----------|
| $V_{\text{Sn}}$         | 5.856            | 6.274    | 6.499    |
| $V_{\text{Te}}$         | 6.530            | 6.108    | 6.474    |
| $\text{Sn}_i$           | 6.534            | 6.137    | 6.305    |
| $\text{Te}_i$           | 6.511            | 6.476    | 6.616    |
| $\text{Sn}_{\text{Te}}$ | 6.183            | 6.458    | 6.598    |
| $\text{Te}_{\text{Sn}}$ | 6.364            | 6.275    | 6.556    |
| perfect                 | 6.317            | 6.316    | 6.520    |

**Table S5.** The electronic thermal conductivity ( $\kappa_e$ ) of the SnTe-CT and SnTe-ST samples at different temperatures obtained based on the measured electrical conductivity and Wiedemann–Franz relation.

| T(K) | $\kappa_e$ (W/mK) |         |
|------|-------------------|---------|
|      | SnTe-CT           | SnTe-ST |
| 300  | 3.33              | 2.72    |
| 350  | 3.35              | 2.86    |
| 400  | 3.51              | 3.06    |
| 450  | 3.57              | 3.22    |
| 500  | 3.65              | 3.36    |
